# Supplementary material
Source: PubMed Central journal article supplement (PMC7710015)
Supplement: develop-147-193862-s1.pdf [file develop-147-193862-s1.pdf]

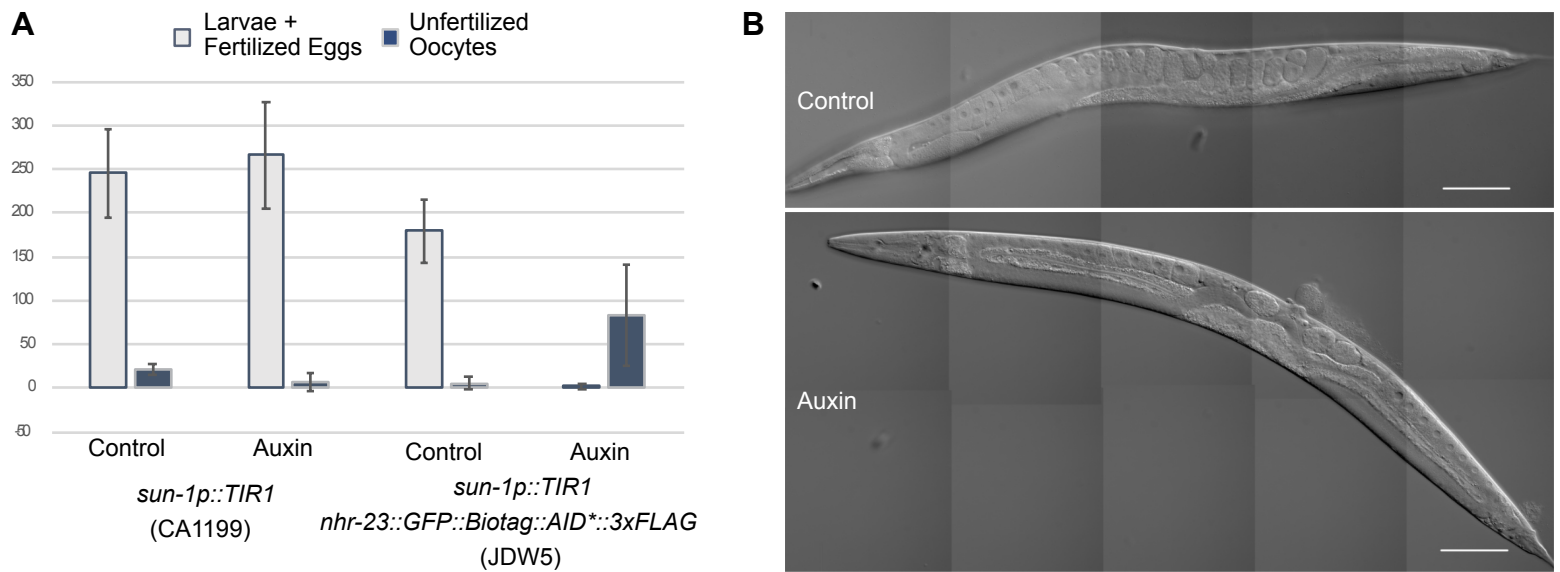

**Fig. S1. NHR-23-depletion in worms expressing TIR1 from a *sun-1* promoter causes sterility similar to that observed when TIR1 is expressed from the *mex-5* promoter.** (A) Combined count of L1 larvae/fertilized egg progeny or unfertilized oocyte from hermaphrodites grown from L1 onwards with or without 4 mM auxin. Error bars=standard deviation (n=12 for each condition) (B) Representative DIC images of L4 + 1 day *nhr-23::GFP::Biotag::AID\*::3xFLAG; sun-1p::TIR1* hermaphrodites in the absence (top) or presence (bottom) of 4 mM auxin. Scale bars: 80  $\mu$ m.

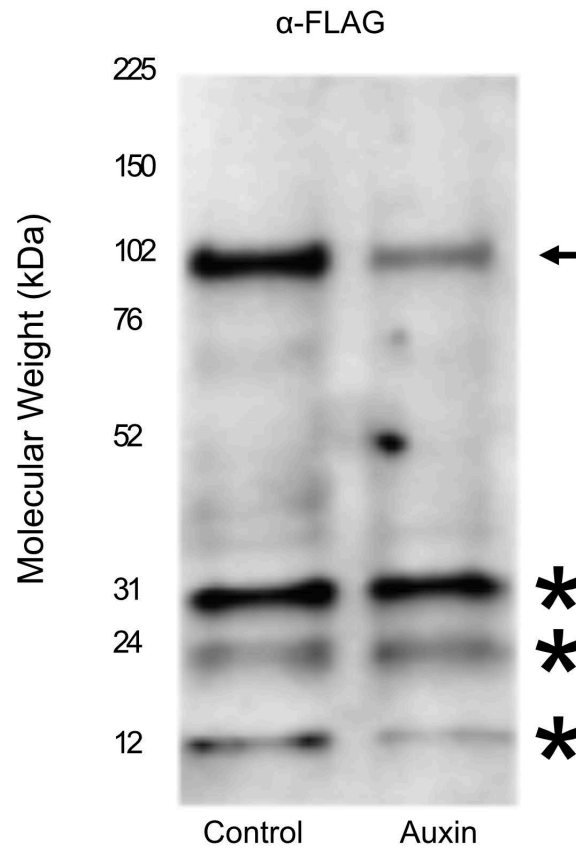

**Fig. S2. Assessing NHR-23 depletion by western blot.** Anti-FLAG immunoblot analyses as in Fig. 3 showing the entire blot. Arrow indicates NHR-23::GFP::AID\*::3xFLAG band. Stars indicate background bands previously reported (Ward, 2015).

A

| Scheme Number | Crossing Scheme<br>Male Genotype [crossed to <i>spe-8 (hc50); him-8 (e1489)</i> ]         | Life Stage of Male | Media   | N  | # Live Progeny        |        |
|---------------|-------------------------------------------------------------------------------------------|--------------------|---------|----|-----------------------|--------|
|               |                                                                                           |                    |         |    | Mean (SD)             | Median |
| 1             | None (self)                                                                               | -                  | Control | 10 | 0                     | 0      |
| 2             | <i>him-5 (e1490)</i>                                                                      | L4                 | Control | 9  | 185.6 ( $\pm 116.5$ ) | 165    |
| 3             | JDW92 <i> wrdSi19(mex-5p::TIR1), nhr-23(kry61(nhr-23::AID*-TEV-3xFLAG)); him-5(e1490)</i> | L4                 | Control | 10 | 223.3 ( $\pm 106.3$ ) | 232    |
| 4             | JDW92 <i> wrdSi19(mex-5p::TIR1), nhr-23(kry61(nhr-23::AID*-TEV-3xFLAG)); him-5(e1490)</i> | L4                 | Auxin   | 14 | 32.9 ( $\pm 56.7$ )   | 7.5    |
| 5             | JDW92 <i> wrdSi19(mex-5p::TIR1), nhr-23(kry61(nhr-23::AID*-TEV-3xFLAG)); him-5(e1490)</i> | Young Adult        | Auxin   | 10 | 0.4 ( $\pm 0.8$ )     | 0      |

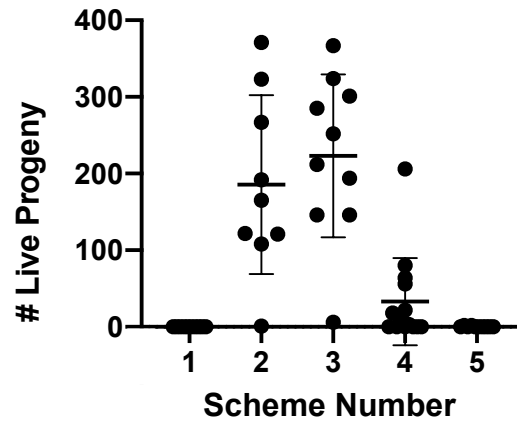

B

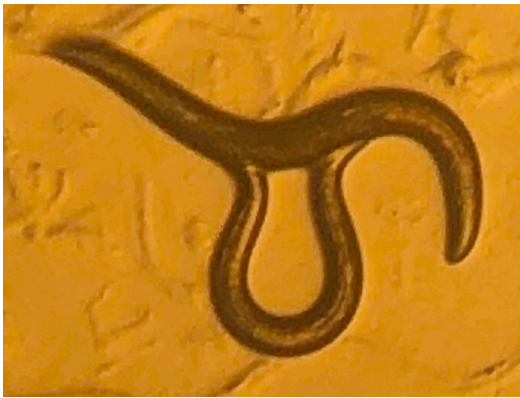

**Fig. S3. Mating/Transactivation Assay.** (A) Quantitation of live progeny produced from the indicated crosses to *spe-8(hc50); him-8(e1489)* hermaphrodites. Standard deviation (SD) is provided in the table. In the graph, the center horizontal lines for each crossing scheme represent mean and the whiskers represent standard deviation. (B) Image of JDW92  *wrdSi19[mex-5p::TIR1:F2A:mTagBFP2:tbb-2 3'UTR, I:-5.32], nhr-23(kry61(nhr-23::AID\*::TEV::3xFLAG)) I; him-5(e1490) V* animals grown on auxin. The male in the image is engaging in mating behavior.

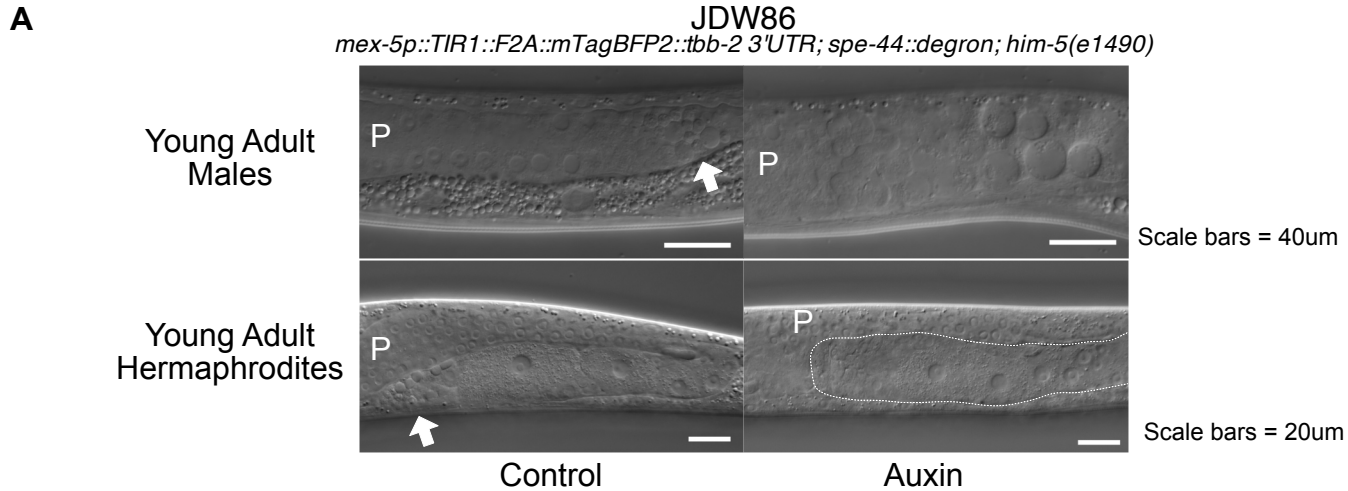

**B**

|        | Genotype                                                                                           | Media   | N  | Mean (SEM)           | Median |
|--------|----------------------------------------------------------------------------------------------------|---------|----|----------------------|--------|
| N2     | Wild-type                                                                                          | Control | 12 | 273.5 ( $\pm 11.4$ ) | 269    |
| JDW101 | <i>wrd20(spe-44::30xlinker::mScarlet::Lox511l::3xMyc)</i>                                          | Control | 12 | 264.8 ( $\pm 8.6$ )  | 276    |
| JDW86  | <i>wrdSi15(mex-5p::TIR1:F2A:mTagBFP2:tbb-2 3'UTR); spe-44(fx110[spe-44::degron]); him-5(e1490)</i> | Control | 14 | 126.6 ( $\pm 9.5$ )  | 130    |
| JDW86  | <i>wrdSi15(mex-5p::TIR1:F2A:mTagBFP2:tbb-2 3'UTR); spe-44(fx110[spe-44::degron]); him-5(e1490)</i> | Auxin   | 12 | 0                    | 0      |

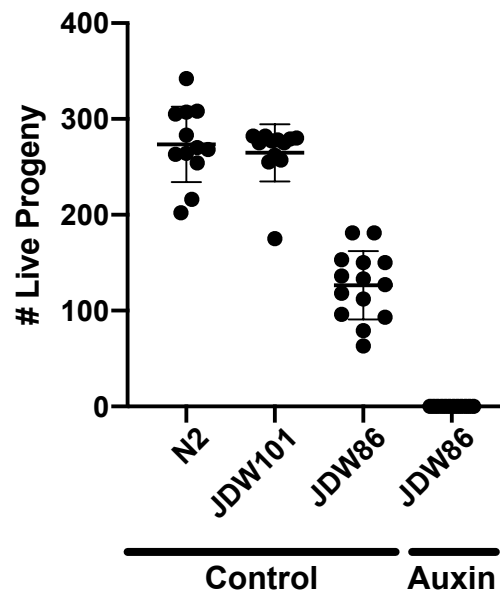

**Fig. S4. Validation of *spe-44* alleles.** (A) DIC images of JDW 86 *wrdSi15[mex-5p::TIR1:F2A:mTagBFP2:tbb-2 3'UTR]; spe-44(fx110[spe-44::AID\*]); him-5(e1490)* young adult males and young adult hermaphrodites grown on control media or 4 mM auxin. The arrows point to examples of mature spermatids in control animal germlines. (B) Live progeny counts from animals of the indicated genotypes. Standard error of the mean (SEM) is provided in the table. In the graph, the center horizontal lines for each strain represent mean and the whiskers represent SEM.

| Table S1. Plasmids used in this study |                                     |                                                                                                                                                                                                              |
|---------------------------------------|-------------------------------------|--------------------------------------------------------------------------------------------------------------------------------------------------------------------------------------------------------------|
| Plasmid                               | Parent plasmid or Reference         | Notes                                                                                                                                                                                                        |
| pCZGY2747                             | Unpublished, gift from Zhiping Wang | <i>eft-3p::Cas9; U6p::sgRNA</i> vector targeting LGI site where ttTi4348 is inserted                                                                                                                         |
| pDD363                                | Dickinson <i>et al.</i> , 2018      | LoxP-flanked SEC donor for the Sap Trap cloning system                                                                                                                                                       |
| pDD372                                | Dickinson <i>et al.</i> , 2018      | Codon-optimized GFP donor for the Sap Trap cloning system                                                                                                                                                    |
| pDD379                                | Dickinson <i>et al.</i> , 2018      | SapTrap destination vector for building combined sgRNA expression + repair template vectors, using the F+E sgRNA scaffold                                                                                    |
| pJW1254                               | Zhang <i>et al.</i> , 2015          | <i>eft-3p::Cas9; U6p::sgRNA</i> (F+E) targeting <i>nhr-23</i> 3' end                                                                                                                                         |
| pJW1357                               | Ashley <i>et al.</i> , 2020         | <i>mex-5p::TIR1:F2A:mTagBFP2</i> construct for knock-in at LGI site where ttTi4348 is inserted                                                                                                               |
| pJW1598                               | Ashley <i>et al.</i> , 2020         | linker:: <i>GFP^SEC^BioTag::AID*::3xFLAG</i> vector for C-terminally tagging NHR-23                                                                                                                          |
| pJW1659                               | Ashley <i>et al.</i> , 2020         | 9 amino acid flexible linker:: <i>AID*-3xFLAG</i> donor for NT slot in the Sap Trap cloning system                                                                                                           |
| pJW1725                               | pDD379                              | repair template for C-terminally tagging NHR-23 generated by Sap Trap: linker:: <i>GFP^SEC^AID*::3xFLAG</i> with <i>nhr-23</i> homology arms; <i>U6p::nhr-23</i> sgRNA (F+E)                                 |
| pJW1776                               | pDONR221                            | <i>nhr-23</i> 5' homology arm for Sap Trap cloning (Sap sites in arm are silently mutated)                                                                                                                   |
| pJW1781                               | pDONR221                            | <i>nhr-23</i> 3' arm for Sap Trap cloning                                                                                                                                                                    |
| pJW1816                               | Ashley <i>et al.</i> , 2020         | 30 amino acid flexible linker:: <i>mScarlet^SEC</i> (Lox5111) <sup>^</sup> 3xMyc multicassette donor for the Sap Trap cloning system                                                                         |
| pJW1838                               | Ashley <i>et al.</i> , 2020         | Sap Trap sgRNA vector, U6 promoter and 3'UTR from Calarco paper with F+E sgRNA modifications                                                                                                                 |
| pJW1872                               | pJW1838                             | <i>U6::sgRNA</i> targeting <i>spe-44</i> 3' end                                                                                                                                                              |
| pJW1876                               | Ashley <i>et al.</i> , 2020         | repair template for C-terminally tagging SPE-44 generated by SapTrap:: 30 amino acid flexible linker:: <i>germ line optimized mScarlet^SEC</i> (Lox5111) <sup>^</sup> 3xMyc with <i>spe-44</i> homology arms |
| pJW258                                | pDONR221                            | <i>nhr-23</i> cDNA in Gateway entry vector                                                                                                                                                                   |
| pMLS257                               | Schwartz <i>et al.</i> , 2016       | Sap Trap repair template backbone lacking the <i>U6p::sgRNA</i> cassette                                                                                                                                     |
| pMLS287                               | Schwartz <i>et al.</i> , 2016       | SapTrap flexible 12 amino acid linker C-terminal connector donor plasmid                                                                                                                                     |

Table S2. Oligonucleotides used in this study

[Click here to Download Table S2](#)

| <b>Table S3. sgRNAs and repair oligos used for co-CRISPR in this study</b> |                                      |                                                                                                              |
|----------------------------------------------------------------------------|--------------------------------------|--------------------------------------------------------------------------------------------------------------|
| <b>Name</b>                                                                | <b>Purpose</b>                       | <b>Sequence</b>                                                                                              |
| <i>dpy-10</i> sgRNA                                                        | Co-CRISPR to inactivate <i>fog-3</i> | taatcgactcactataggctaccataggcaccacgagggttaaga<br>gctatgctggaaac                                              |
| <i>fog-3</i> sgRNA                                                         | Co-CRISPR to inactivate <i>fog-3</i> | taatcgactcactatagtagacgagaaatgtgagacgggttaaga<br>gctatgctggaa                                                |
| <i>dpy-10</i> ( <i>cn64</i> ) repair oligo                                 | Co-CRISPR to inactivate <i>fog-3</i> | cacttgaacttcaatacggcaagatgagaatgactggaaaccgta<br>ccgcatgcggtgcctatggtagcggagcttcacatggctcagacc<br>aacagcctat |
| <i>fog-3</i> repair oligo                                                  | Co-CRISPR to inactivate <i>fog-3</i> | aggtcggcatatttggcgtgaactggaaactacgaattctaaa<br>gtctcacatttctcgtctacctgggatgttcatca                           |
